# Supplementary material
Source: PubMed Central journal article supplement (PMC6916264)

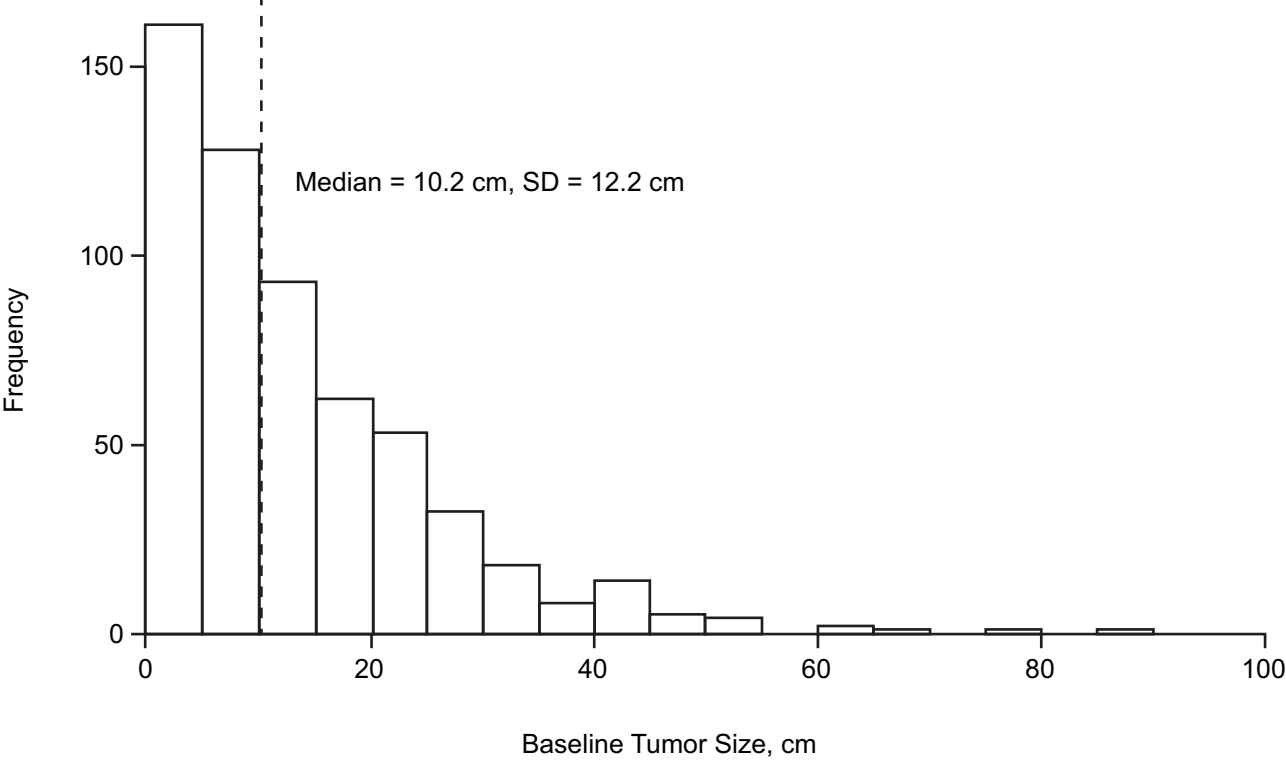

Supplement: NIHMS1538411-supplement-4.pdf [file NIHMS1538411-supplement-4.pdf]

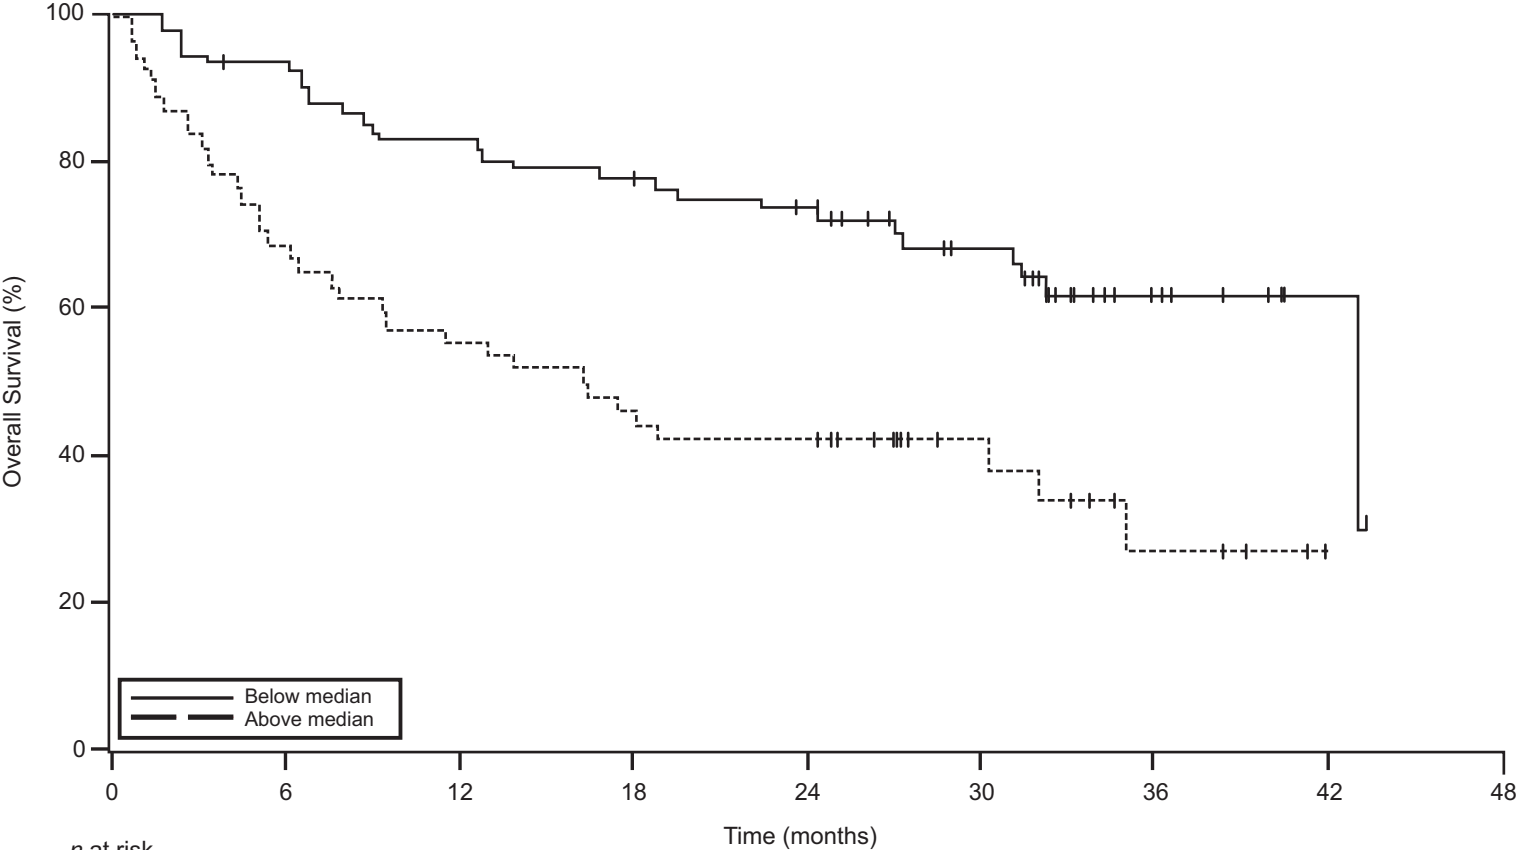

*n* at risk

|              |    |    |    |    |    |    |    |   |   |
|--------------|----|----|----|----|----|----|----|---|---|
| Below median | 78 | 72 | 64 | 60 | 55 | 33 | 11 | 2 | 0 |
| Above median | 56 | 37 | 30 | 25 | 23 | 10 | 4  | 0 | 0 |

Supplement: NIHMS1538411-supplement-5.pdf [file NIHMS1538411-supplement-5.pdf]
